# Supplementary material for: A Tentative Study of the Effects of Heat-Inactivation of the Probiotic Strain Shewanella putrefaciens Pdp11 on Senegalese Sole (Solea senegalensis) Intestinal Microbiota and Immune Response
Source: MDPI journal article supplement (doi:10.3390/microorganisms9040808), 2021-04-12
Supplement: s1 [file s1]

## 2.2 section Probiotic microorganism

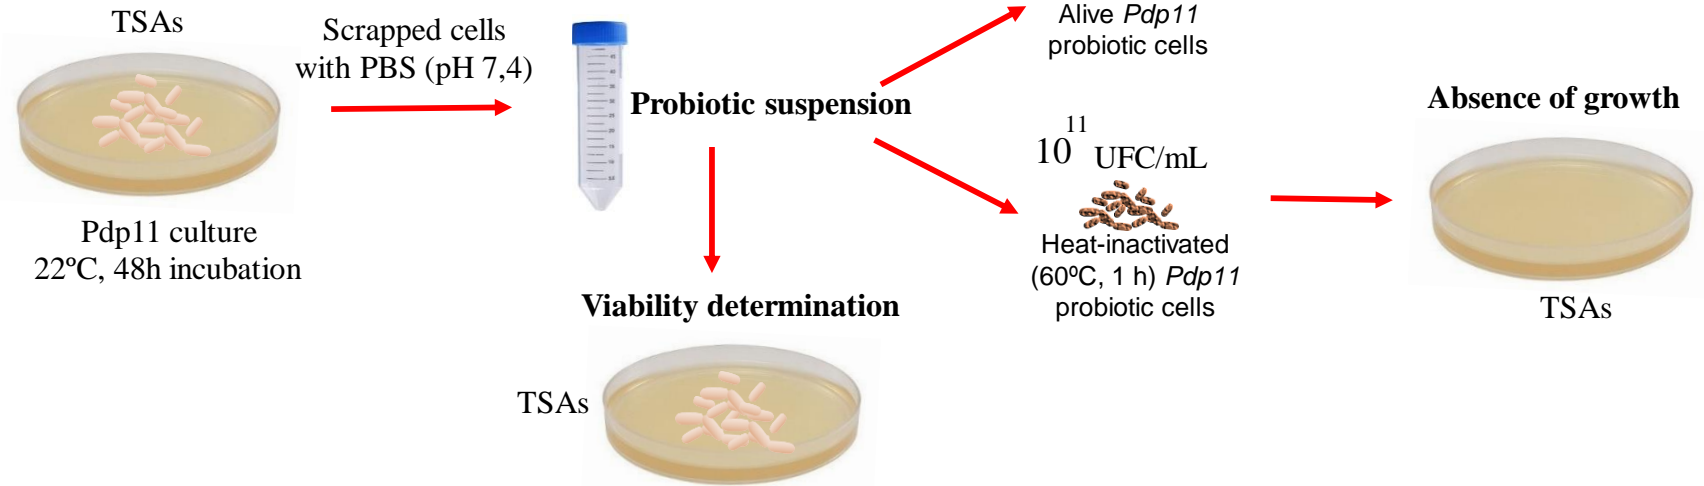

## 2.3 section Experimental diets

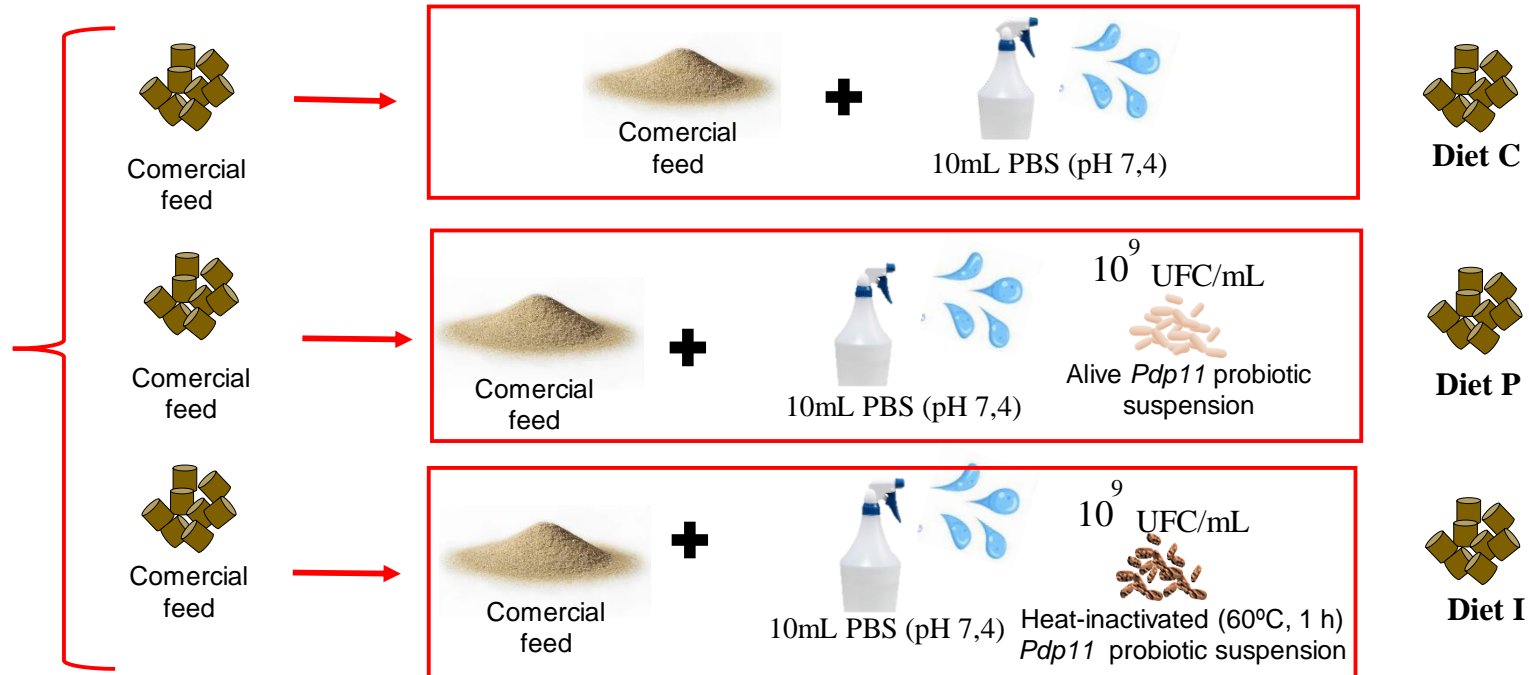

**Figure S1.** Graphical representation of the sections 2.2 (Probiotic microorganism) and 2.3 (Experimental diets).
