# Supplementary material for: A Tentative Study of the Effects of Heat-Inactivation of the Probiotic Strain Shewanella putrefaciens Pdp11 on Senegalese Sole (Solea senegalensis) Intestinal Microbiota and Immune Response
Source: MDPI journal article supplement (doi:10.3390/microorganisms9040808), 2021-04-12
Supplement: s1 [file s1]

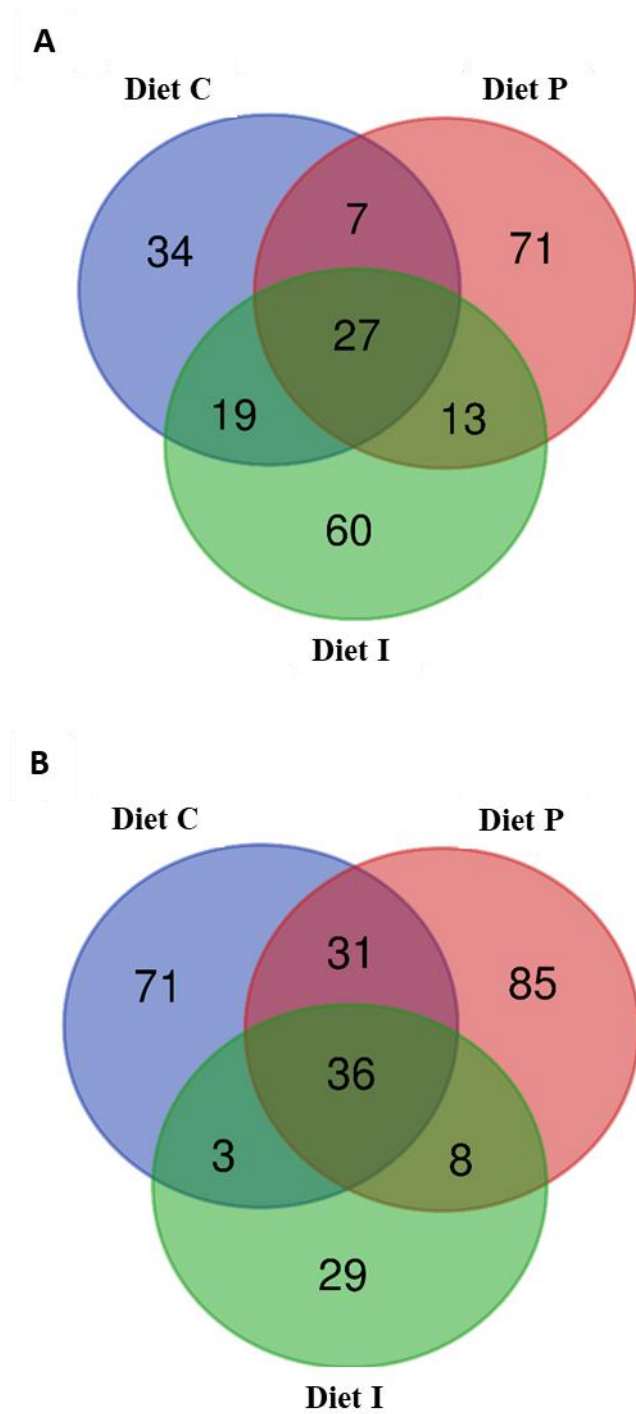

**Figure S2.** Venn diagrams demonstrating the distribution of genera shared in the anterior (A) and posterior (B) intestinal sections of *S. senegalensis* specimens fed control diet (diet C) and the same supplemented with alive (diet P) or inactivated (diet I) cells of the probiotic. Genera numbers are generated from subsets of each group.
