# Supplementary material for: A Tentative Study of the Effects of Heat-Inactivation of the Probiotic Strain Shewanella putrefaciens Pdp11 on Senegalese Sole (Solea senegalensis) Intestinal Microbiota and Immune Response
Source: MDPI journal article supplement (doi:10.3390/microorganisms9040808), 2021-04-12
Supplement: s1 [file s1]

**Table S1.** Relative microbial abundances at family level of the anterior and posterior intestinal sections of *S. senegalensis* specimens fed control diet (diet C) and the same supplemented with alive (diet P) or inactivated (diet I) cells of the probiotics Pdp11. Blanks indicate relative abundance percentage below 1%.

| Family                      | Anterior   |            |            | Posterior  |            |            |
|-----------------------------|------------|------------|------------|------------|------------|------------|
|                             | Diet C (%) | Diet P (%) | Diet I (%) | Diet C (%) | Diet P (%) | Diet I (%) |
| <i>Alcaligenaceae</i>       |            | 2.48       |            |            |            |            |
| <i>Bacteroidaceae</i>       |            | 7.89       |            |            |            |            |
| <i>Bradyrhizobiaceae</i>    |            | 1.19       |            |            |            |            |
| <i>Brevinemataceae</i>      | 13.44      | 3.34       | 50.74      | 77.07      | 13.61      | 88.19      |
| <i>Colwelliaceae</i>        |            | 1.24       |            |            |            |            |
| <i>Enterobacteriaceae</i>   |            | 3.34       |            |            |            |            |
| <i>Lachnospiraceae</i>      |            | 2.49       |            |            |            |            |
| <i>Micrococcaceae</i>       | 1.08       |            |            |            |            |            |
| <i>Moraxellaceae</i>        | 1.24       | 1.31       |            |            |            |            |
| <i>Muribaculaceae</i>       |            | 6.24       |            |            |            |            |
| <i>Mycoplasmataceae_f1</i>  | 67.18      | 3.80       | 32.32      | 7.17       | 54.33      |            |
| <i>Pelagibacteraceae</i>    |            | 1.01       |            |            |            |            |
| <i>Prevotellaceae</i>       |            | 4.04       |            |            |            |            |
| <i>Propionibacteriaceae</i> |            | 1.19       |            |            |            |            |
| <i>Pseudomonadaceae</i>     | 3.71       | 16.41      | 1.94       |            | 2.06       |            |
| <i>Rikenellaceae</i>        |            | 1.69       |            |            |            |            |
| <i>Ruminococcaceae</i>      |            | 4.65       |            |            |            |            |
| <i>Sphingomonadaceae</i>    |            | 1.78       |            |            |            |            |
| <i>Spirochaetaceae</i>      |            |            |            | 9.96       | 25.78      |            |
| <i>Vibrionaceae</i>         |            |            | 4.26       | 1.68       |            | 10.60      |
| <i>Xanthomonadaceae</i>     | 5.72       | 20.75      | 3.59       | 1.04       | 1.57       |            |
| <i>ETC&lt;1</i>             | 8.71       | 15.17      | 6.07       | 3.09       | 2.66       | 1.21       |
